# Supplementary material for: Structural basis of malodour precursor transport in the human axilla
Source: eLife journal article supplement (doi:10.7554/elife.34995), 2018-07-02
Supplement: supp [file elife-34995-supp-v1.zip]

Archive with 13 entries (13 files):
- elife_poa_e34995_Figure_4_figure_supplement_2.docx
- elife_poa_e34995_Figure_2_figure_supplement_4.docx
- elife_poa_e34995_Figure_2_figure_supplement_5.docx
- elife_poa_e34995_Figure_2_figure_supplement_2.docx
- elife_poa_e34995_Figure_4_figure_supplement_3.docx
- elife_poa_e34995_Figure_4_figure_supplement_1.docx
- elife_poa_e34995_Transparent_Reporting_File.pdf
- elife_poa_e34995_Supplementary_file_2.docx
- elife_poa_e34995_Supplementary_file_3.docx
- elife_poa_e34995_Figure_4_figure_supplement_4.docx
- elife_poa_e34995_Supplementary_file_1.docx
- elife_poa_e34995_Figure_2_figure_supplement_1.docx
- elife_poa_e34995_Figure_2_figure_supplement_3.docx
