# Supplementary material for: Structural basis of malodour precursor transport in the human axilla
Source: eLife journal article supplement (doi:10.7554/elife.34995), 2018-07-02
Supplement: supp [file elife-34995-supp-v1.zip › elife_poa_e34995_Supplementary_file_2.docx]

**Supplementary file 2.**

**List of plasmids used in this study**

| Plasmid | Size | Description | | Reference |
| --- | --- | --- | --- | --- |
| pCP20 | 9.40 | | FLP+, pSC101 origin, λ cI857+, λ pR Repts, AmpR, CmR | Cherepanov & Wackernagel (1995) |
| pKD46 | 6.33 | | Contains KanR cassette | Datsenko & Wanner (2000) |
| pBADcLIC2005 | 4.14 | | pBAD vector modified with LIC cassette, PBAD | Geertsma & Poolman (2007) |
| pDtpA | 5.64 | | *dtpA* in pBADcLIC | This study |
| pDtpB | 5.61 | | *dtpB* in pBADcLIC | This study |
| pDtpC | 5.60 | | *dtpC* in pBADcLIC | This study |
| pDtpD | 5.62 | | *dtpD* in pBADcLIC | This study |
| pSH0415 | 5.33 | | *SH0415*  in pBADcLIC | This study |
| pSH1446 | 5.65 | | *SH1446*  in pBADcLIC | This study |
