# Supplementary figures and images for: Structural basis of malodour precursor transport in the human axilla
Source: eLife journal article supplement (doi:10.7554/elife.34995), 2018-07-02

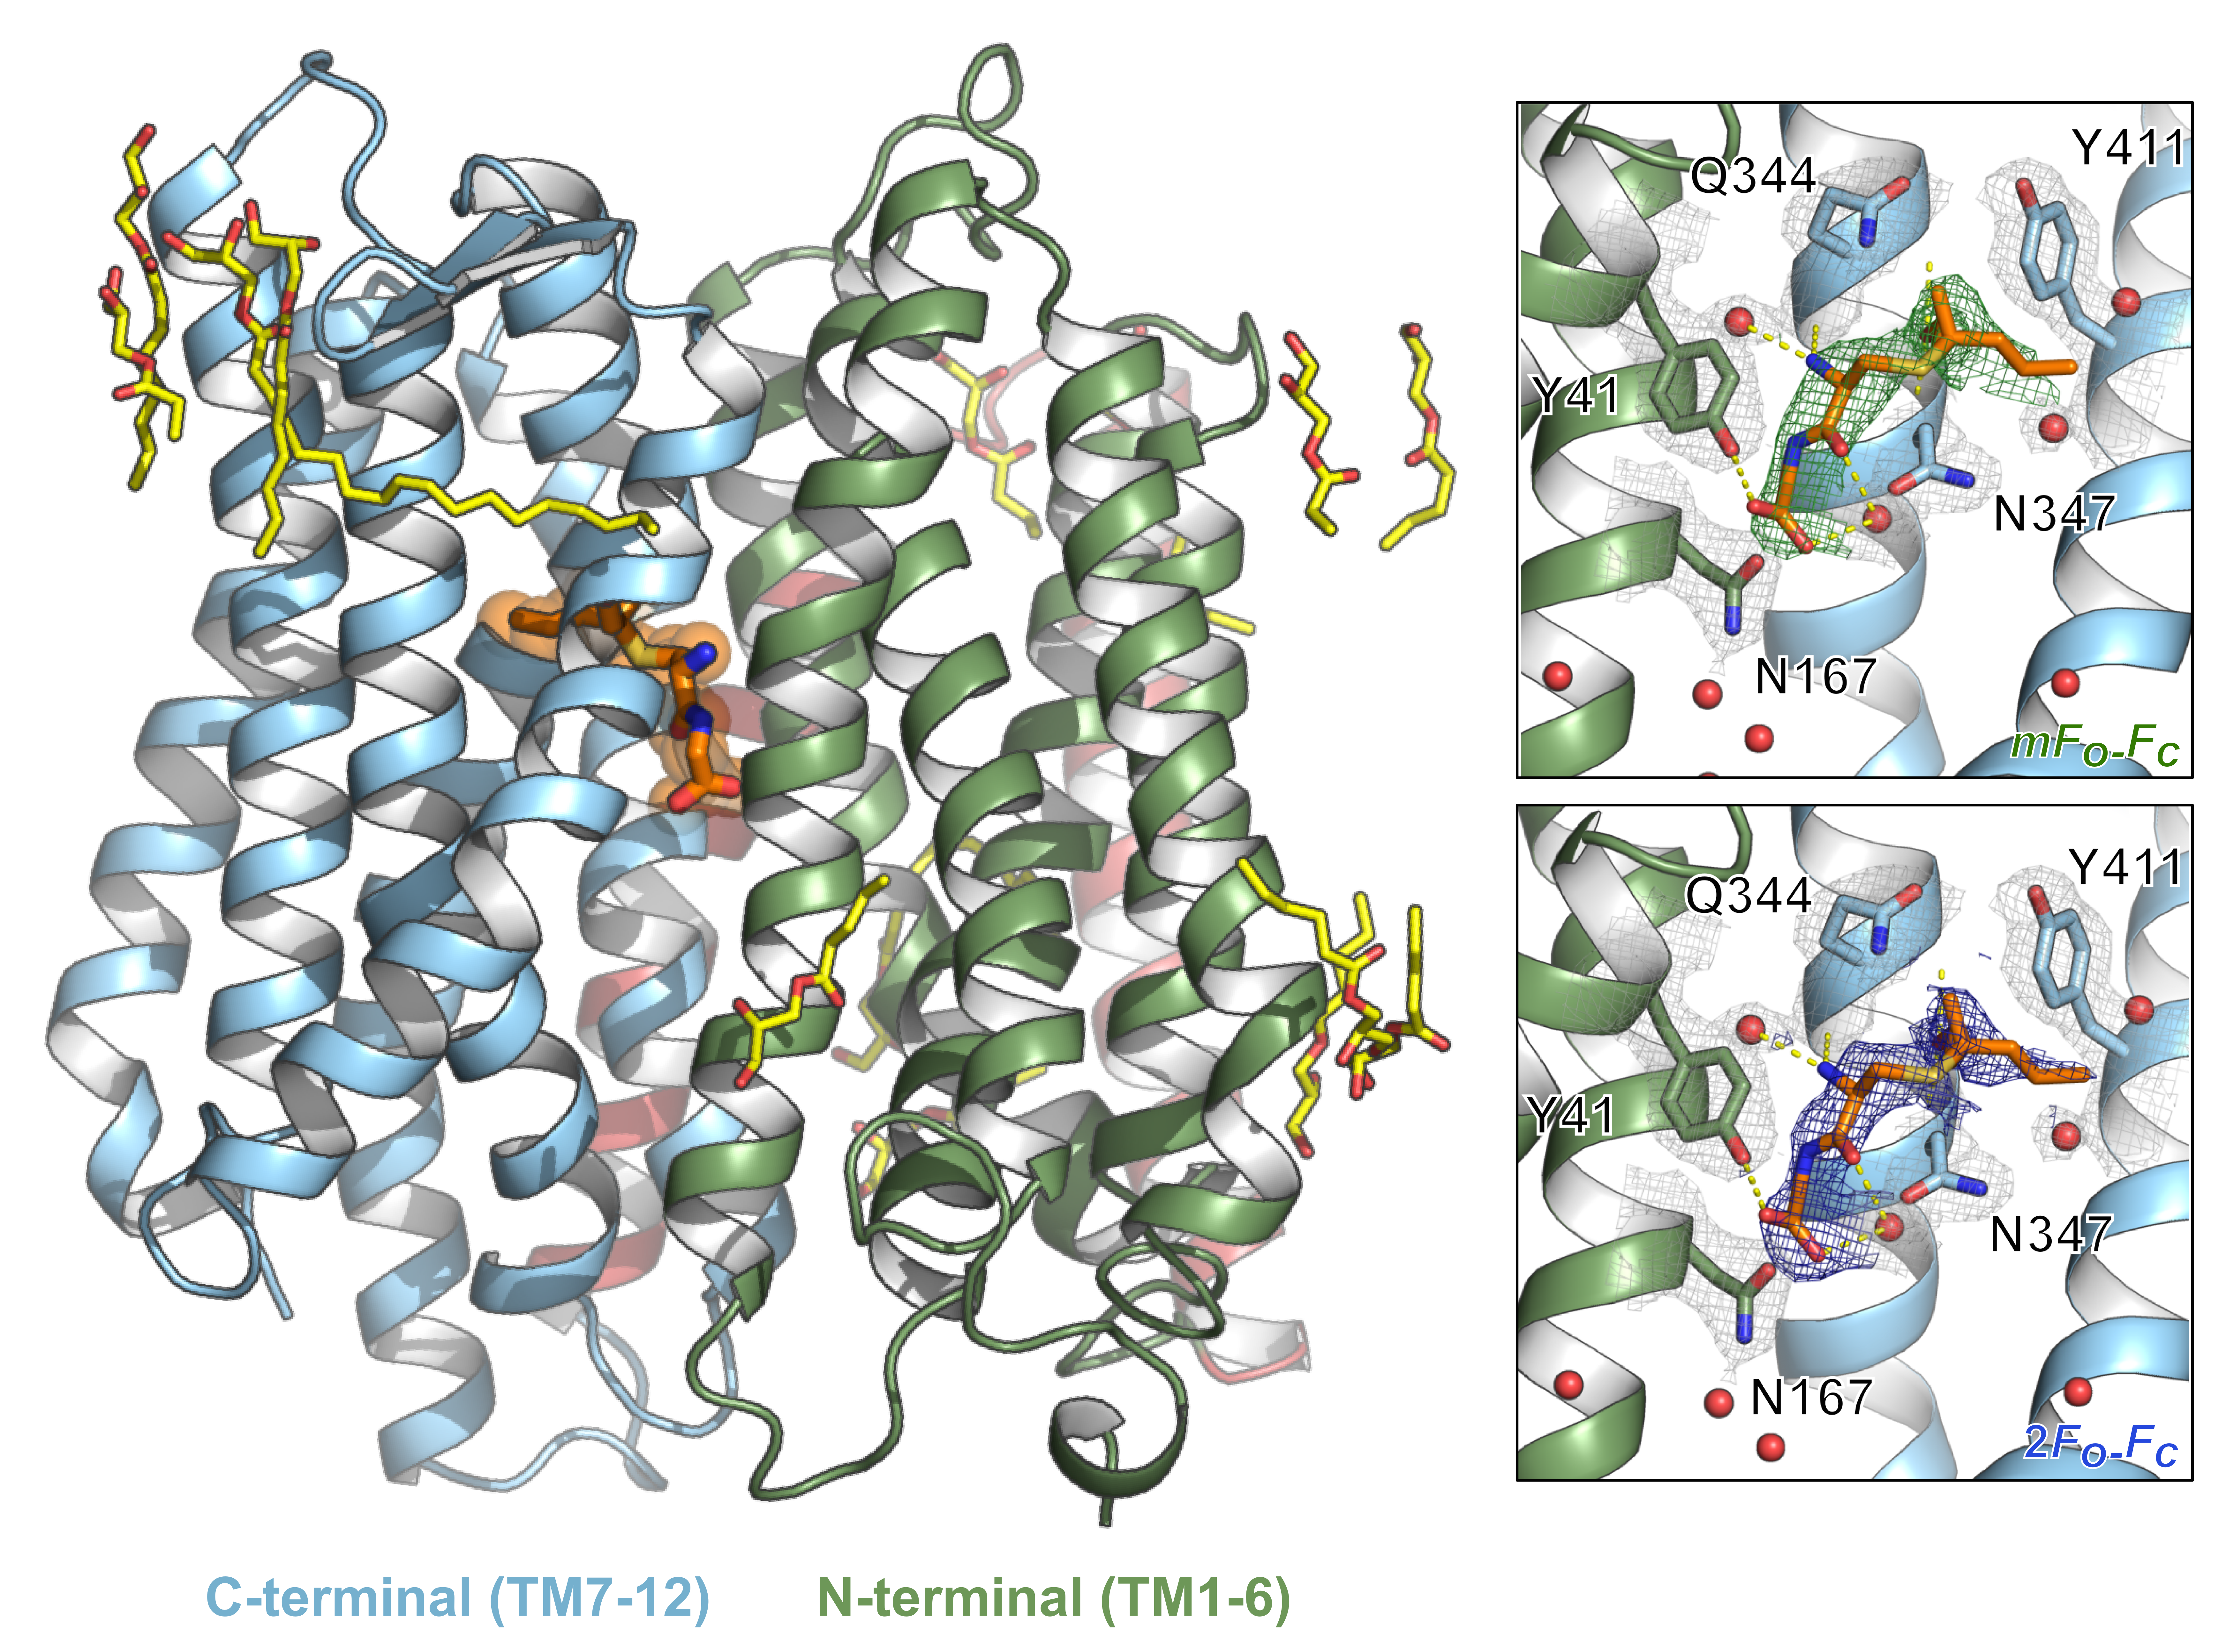

Supplement: supp [file elife-34995-supp-v1.zip › elife_poa_e34995_Figure_4_figure_supplement_3.docx]

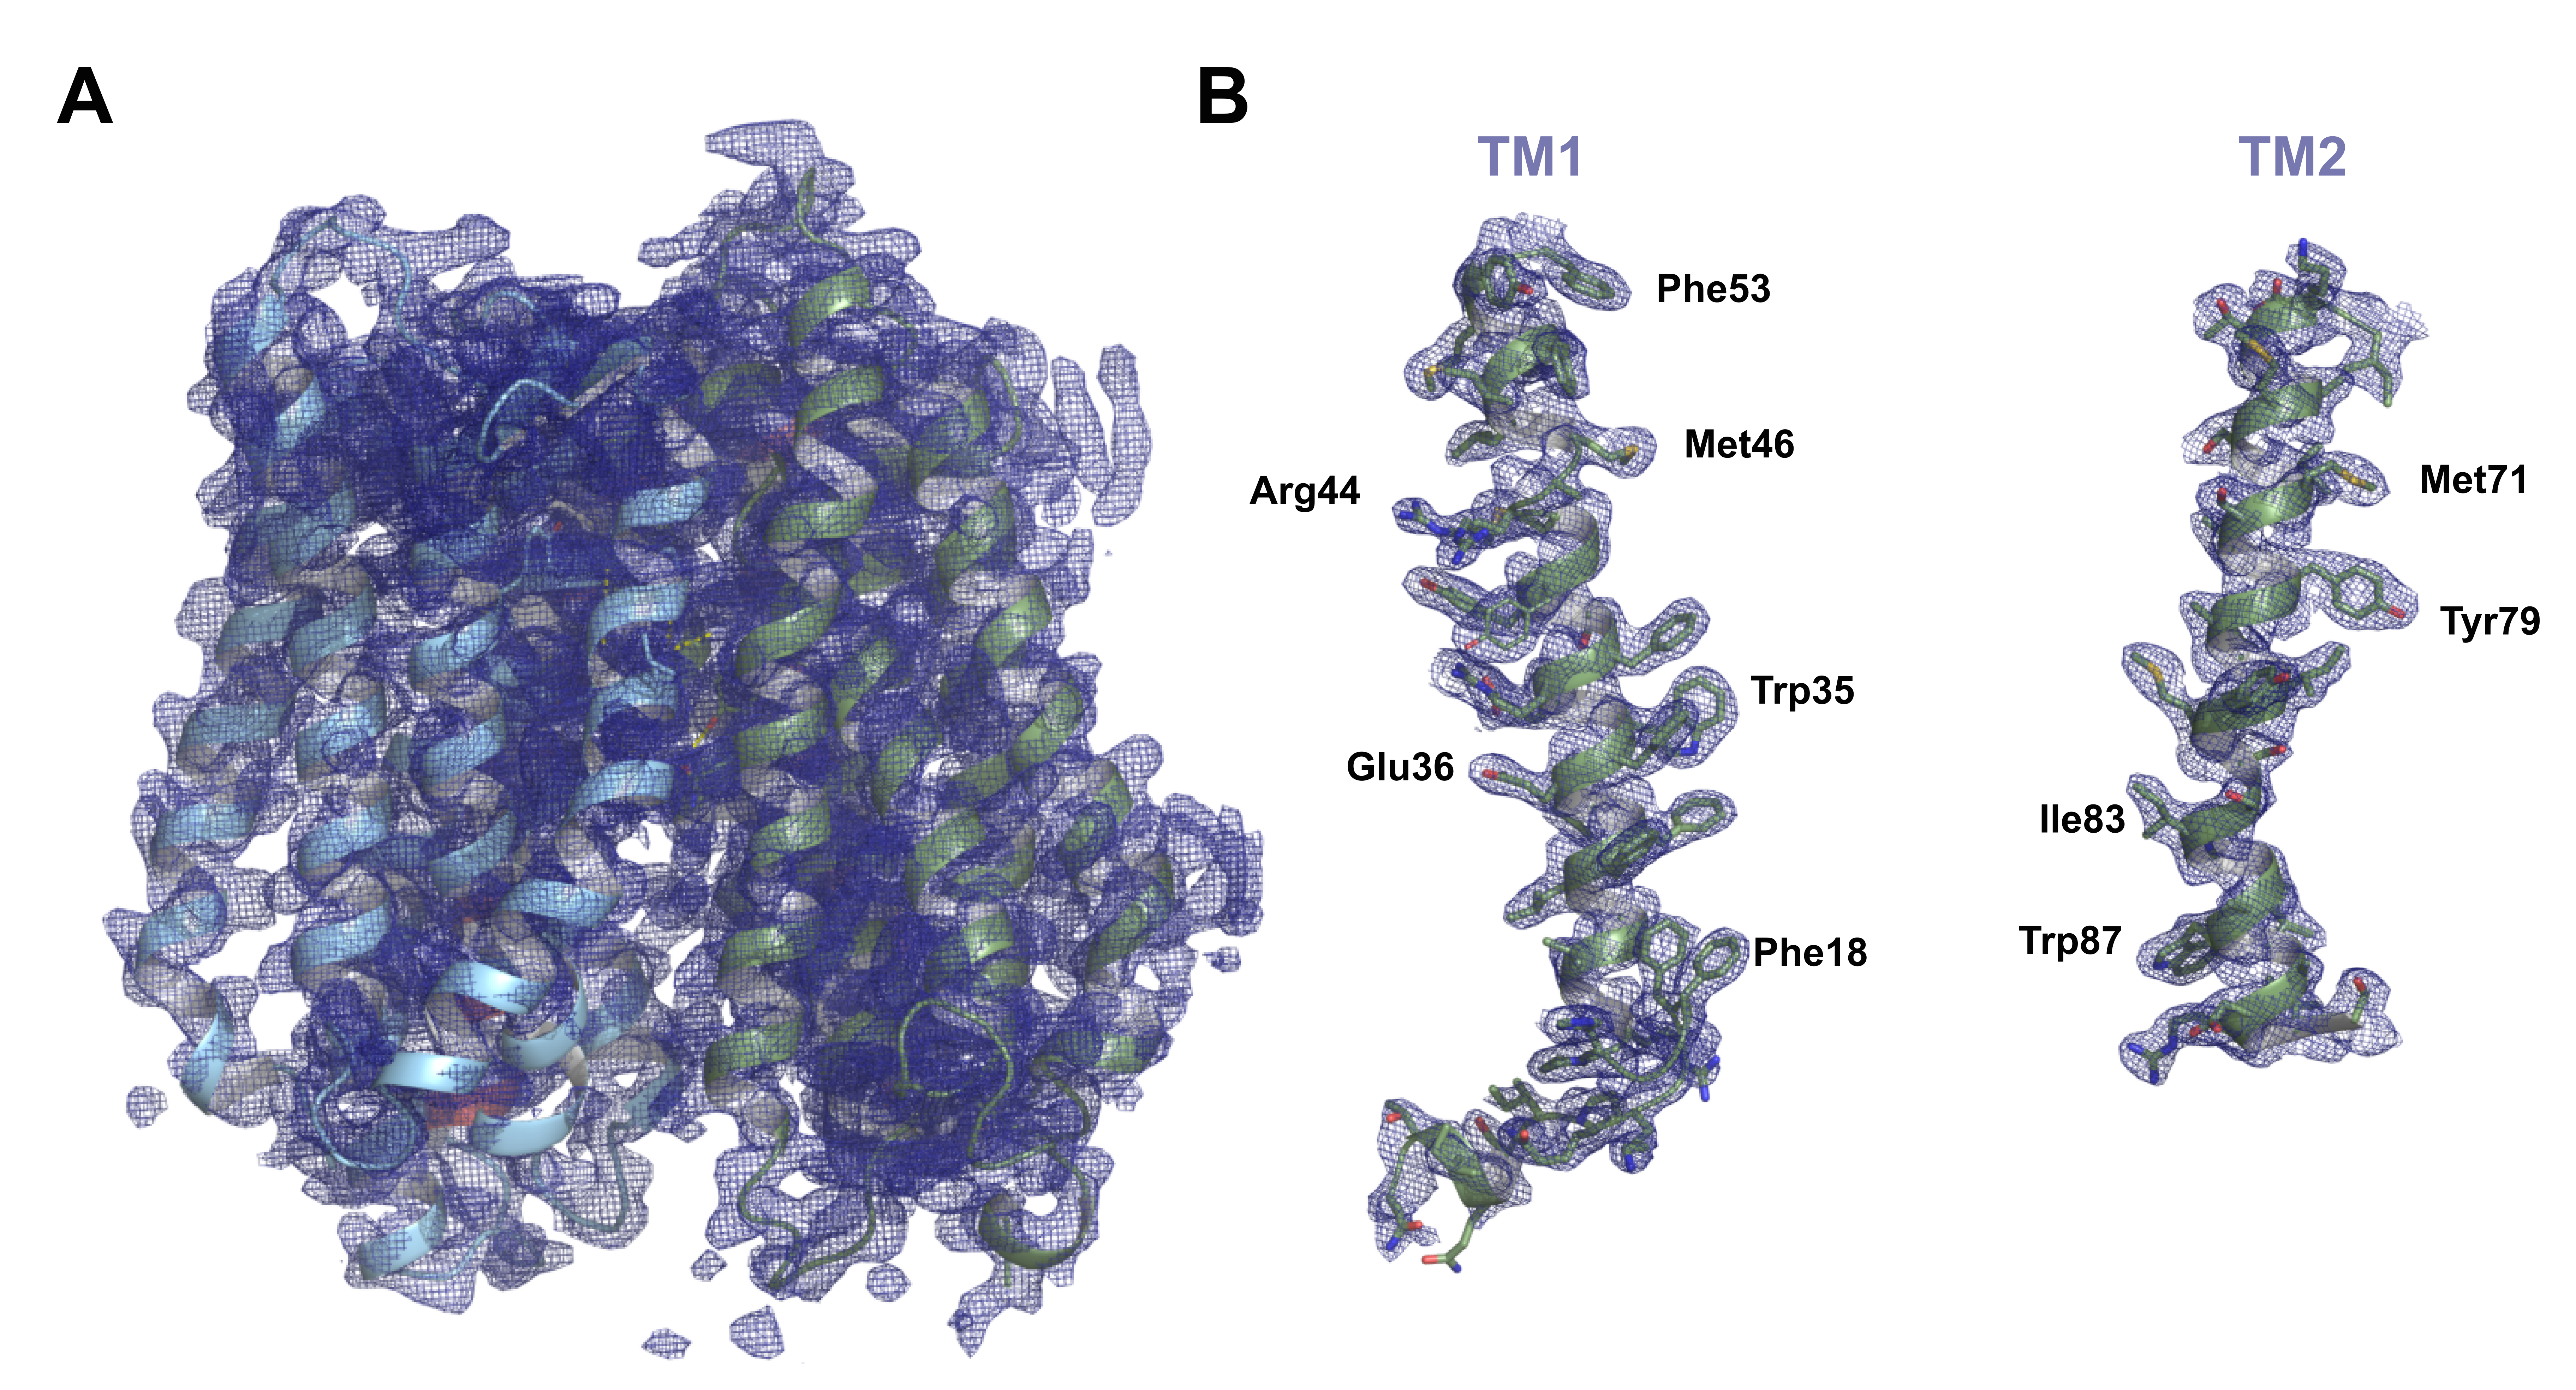

Supplement: supp [file elife-34995-supp-v1.zip › elife_poa_e34995_Figure_4_figure_supplement_1.docx]

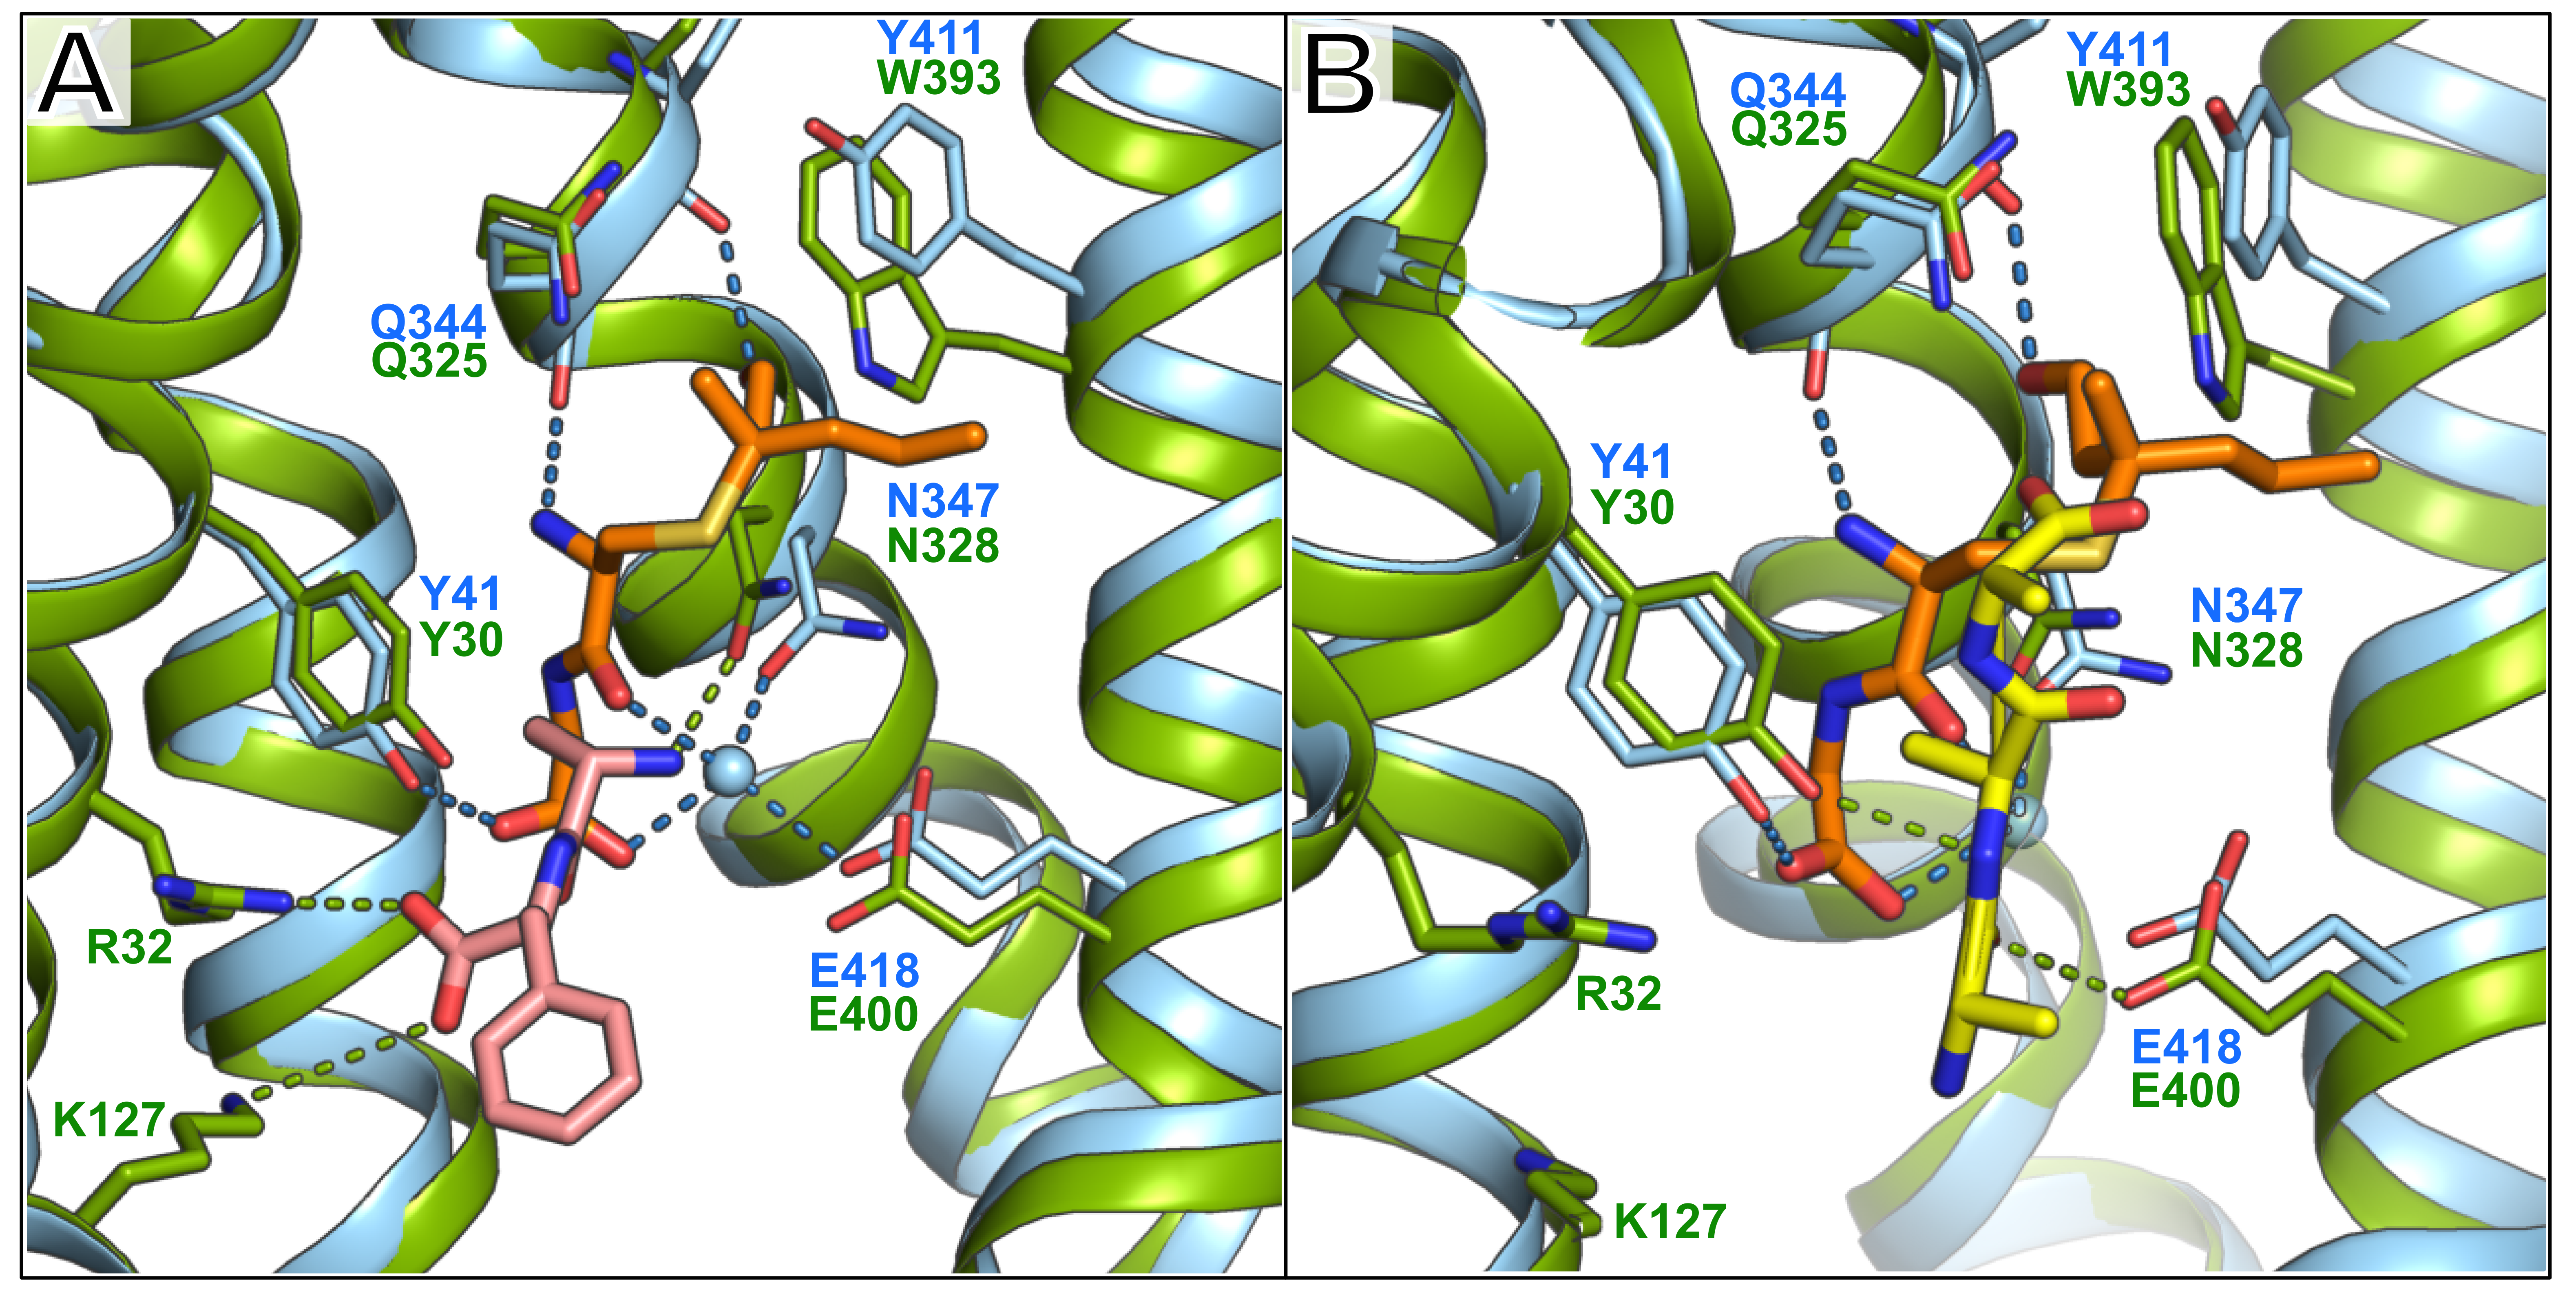

Supplement: supp [file elife-34995-supp-v1.zip › elife_poa_e34995_Figure_4_figure_supplement_4.docx]
